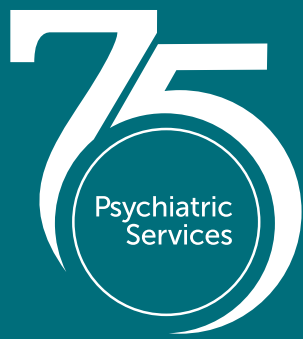

# Psychiatric Services

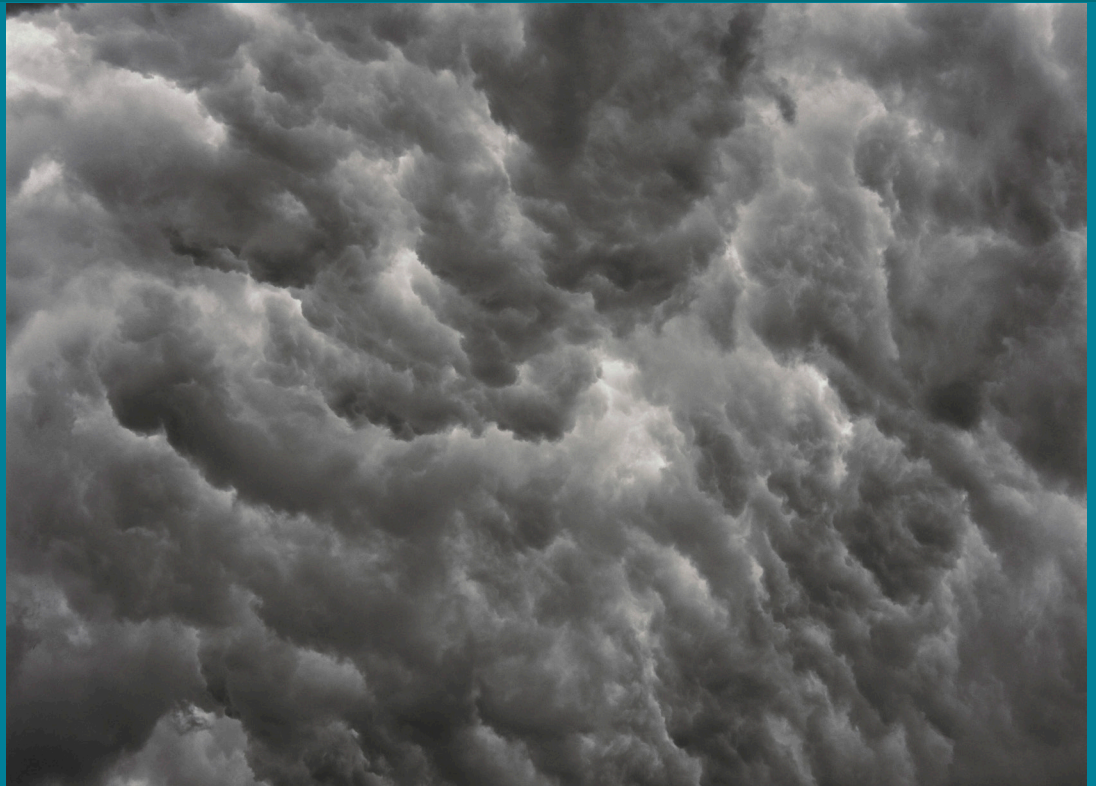

Racial disparities in use and duration of restraints with inpatients

Risky benzodiazepine prescriptions for homeless veterans

The Zero Suicide Model in addiction treatment settings

Collaborative psychopharmacology in adult primary care
